# Supplementary material for: Association of a Disrupted Dipping Pattern of Blood Pressure with Progression of Renal Injury during the Development of Salt-Dependent Hypertension in Rats
Source: MDPI journal article supplement (doi:10.3390/ijms21062248), 2020-03-24

### Figure S1

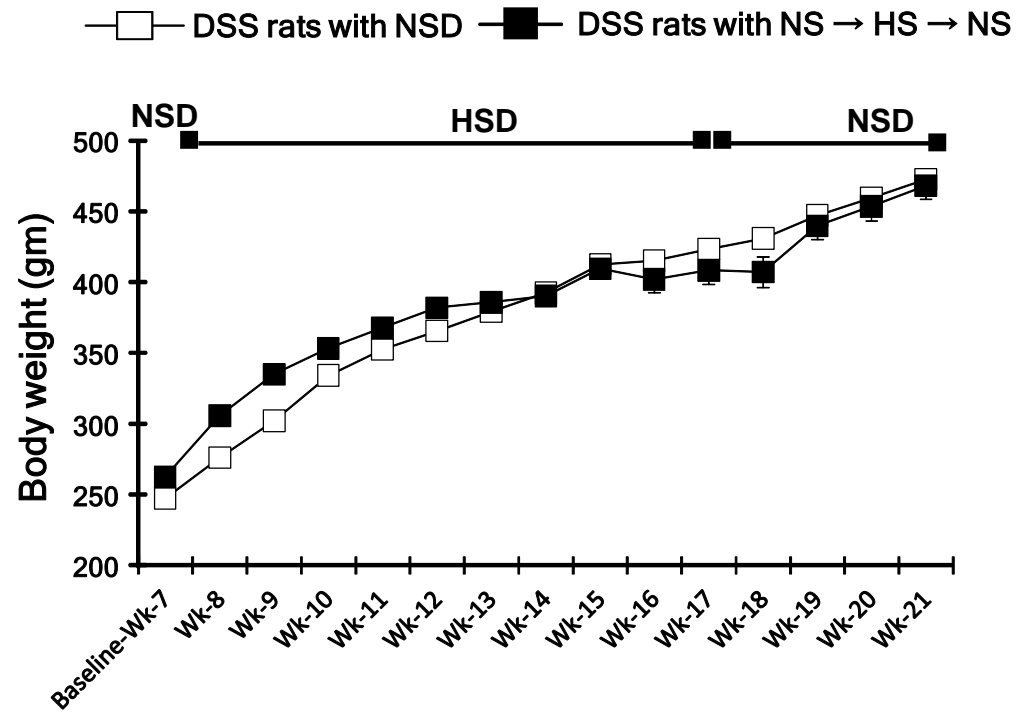

Figure S2

Baseline (week-7), during feeding NSD

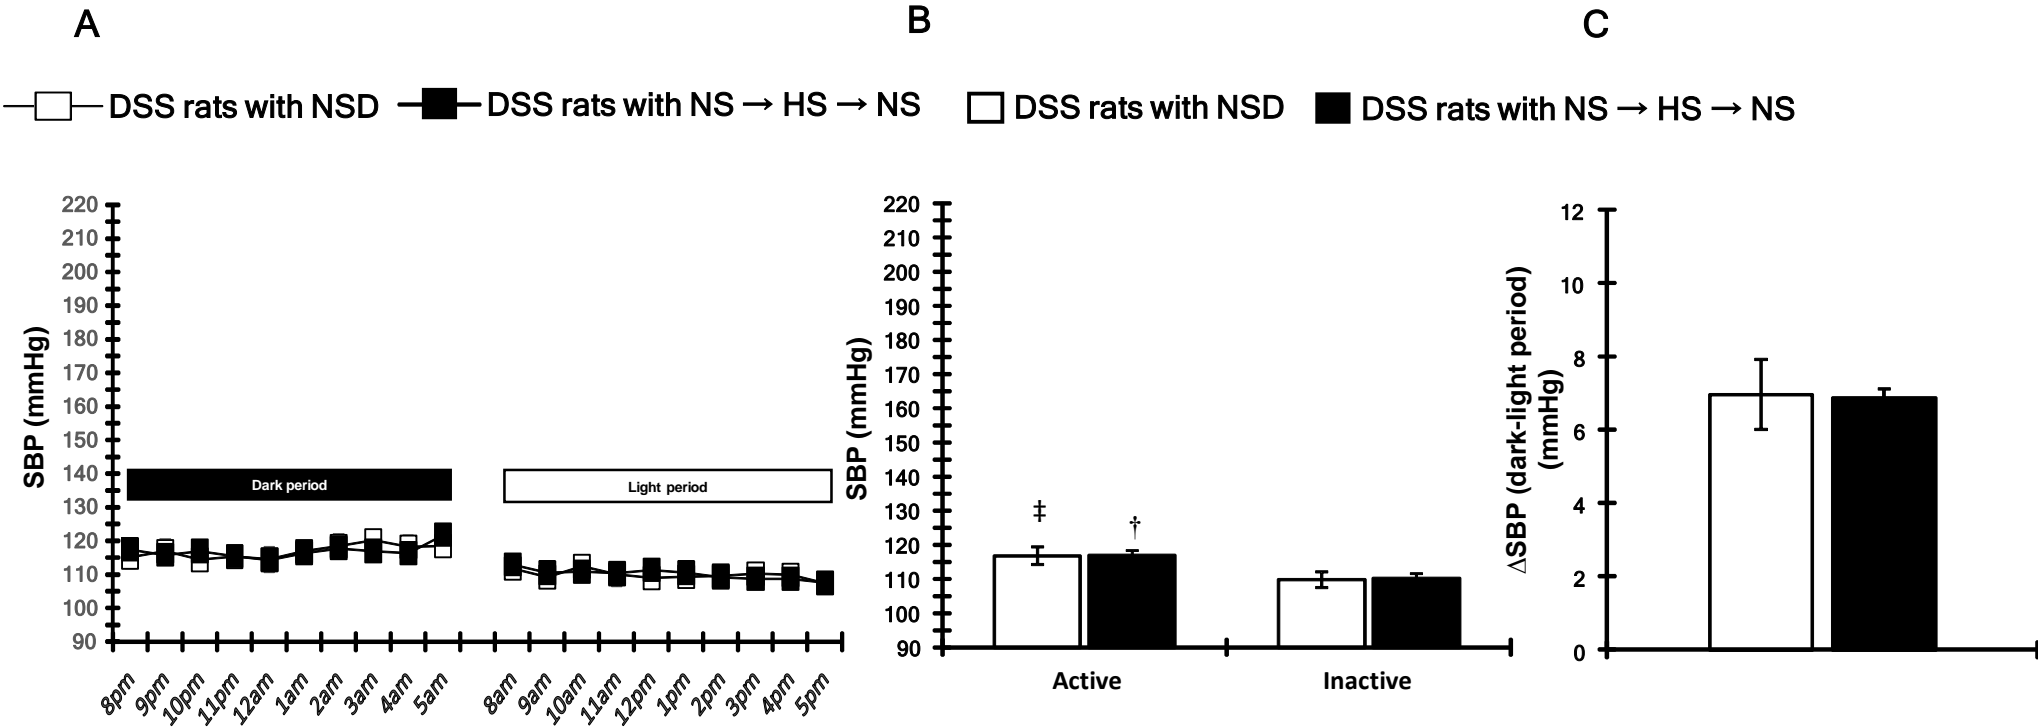

Figure S3

Five days after HSD (week-8)

A

□ DSS rats with NSD    ■ DSS rats with NS → HS → NS

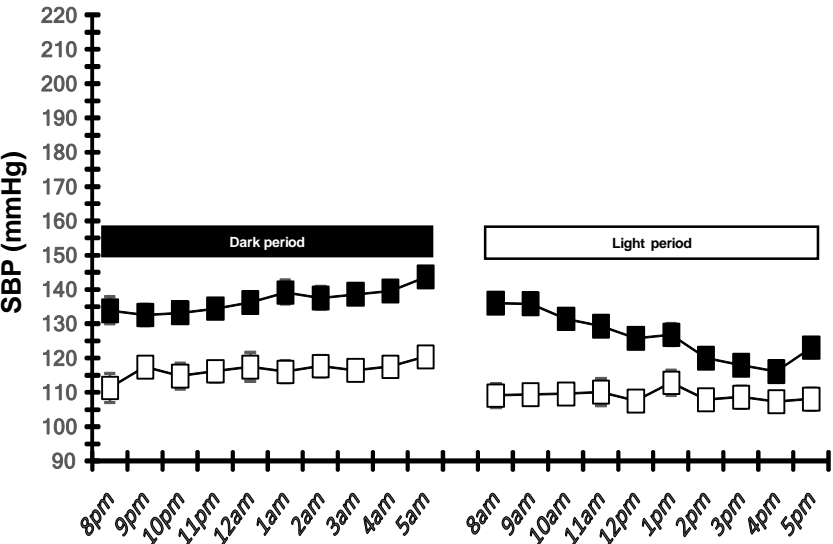

B

□ DSS rats with NSD    ■ DSS rats with NS → HS → NS

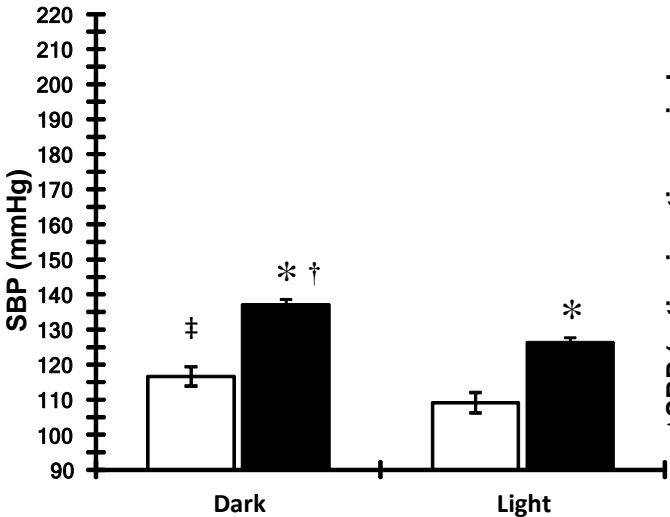

C

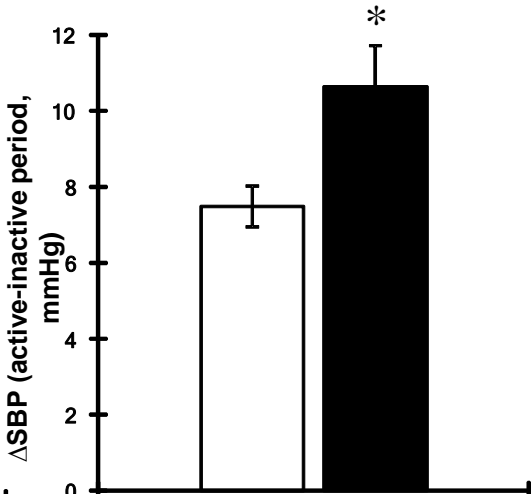

Figure S4

Three weeks after HSD (week-10)

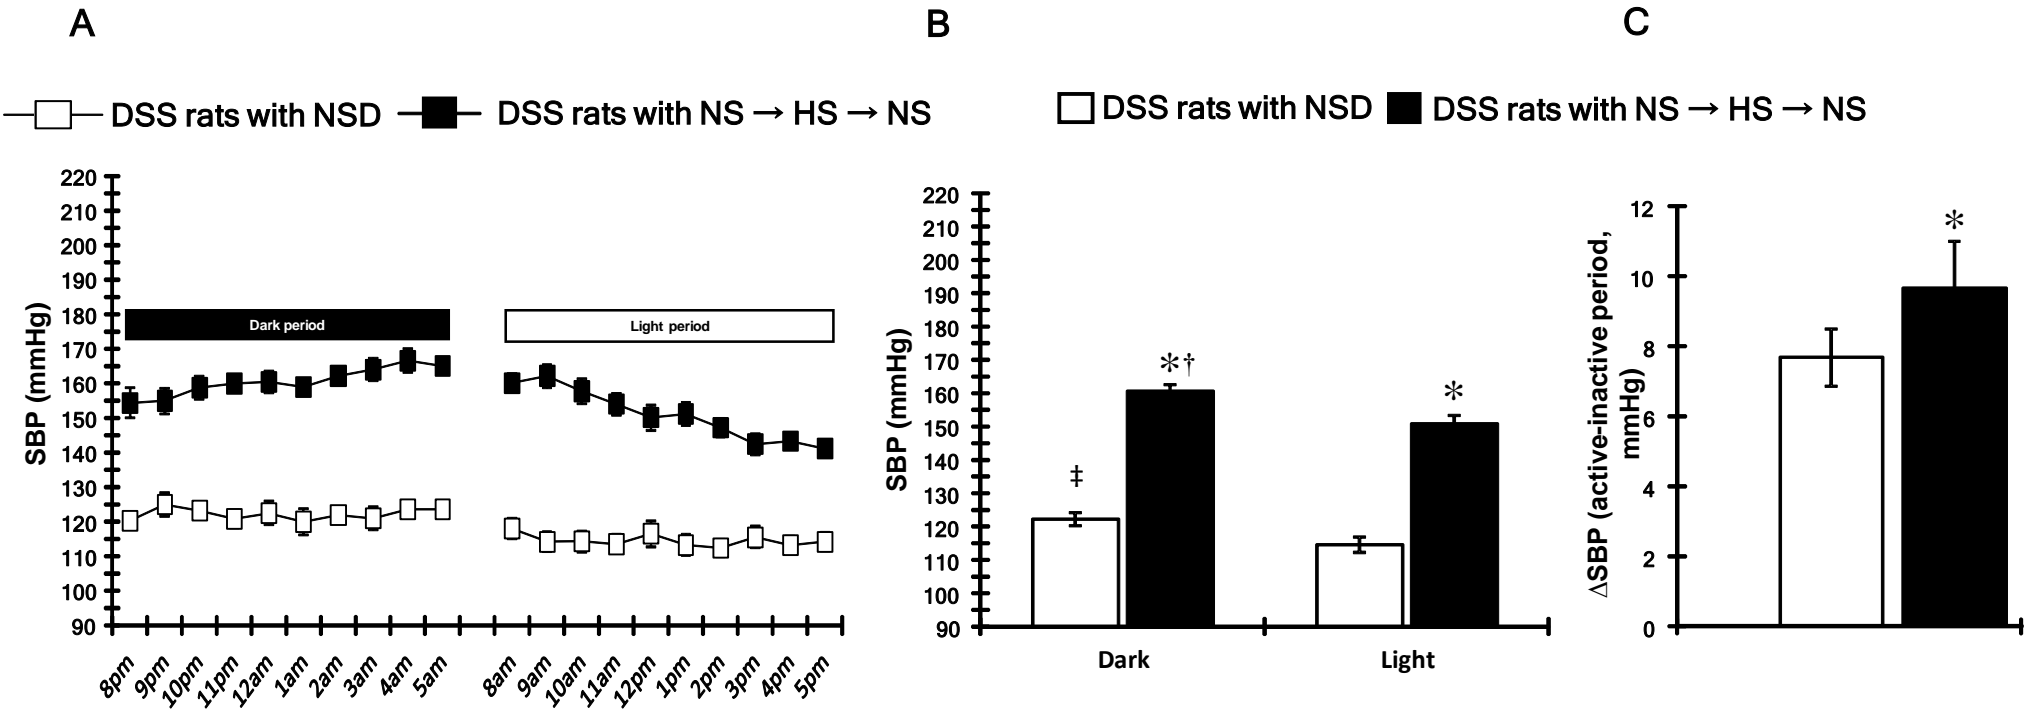

Figure S5

Seven weeks after HSD (week-14)

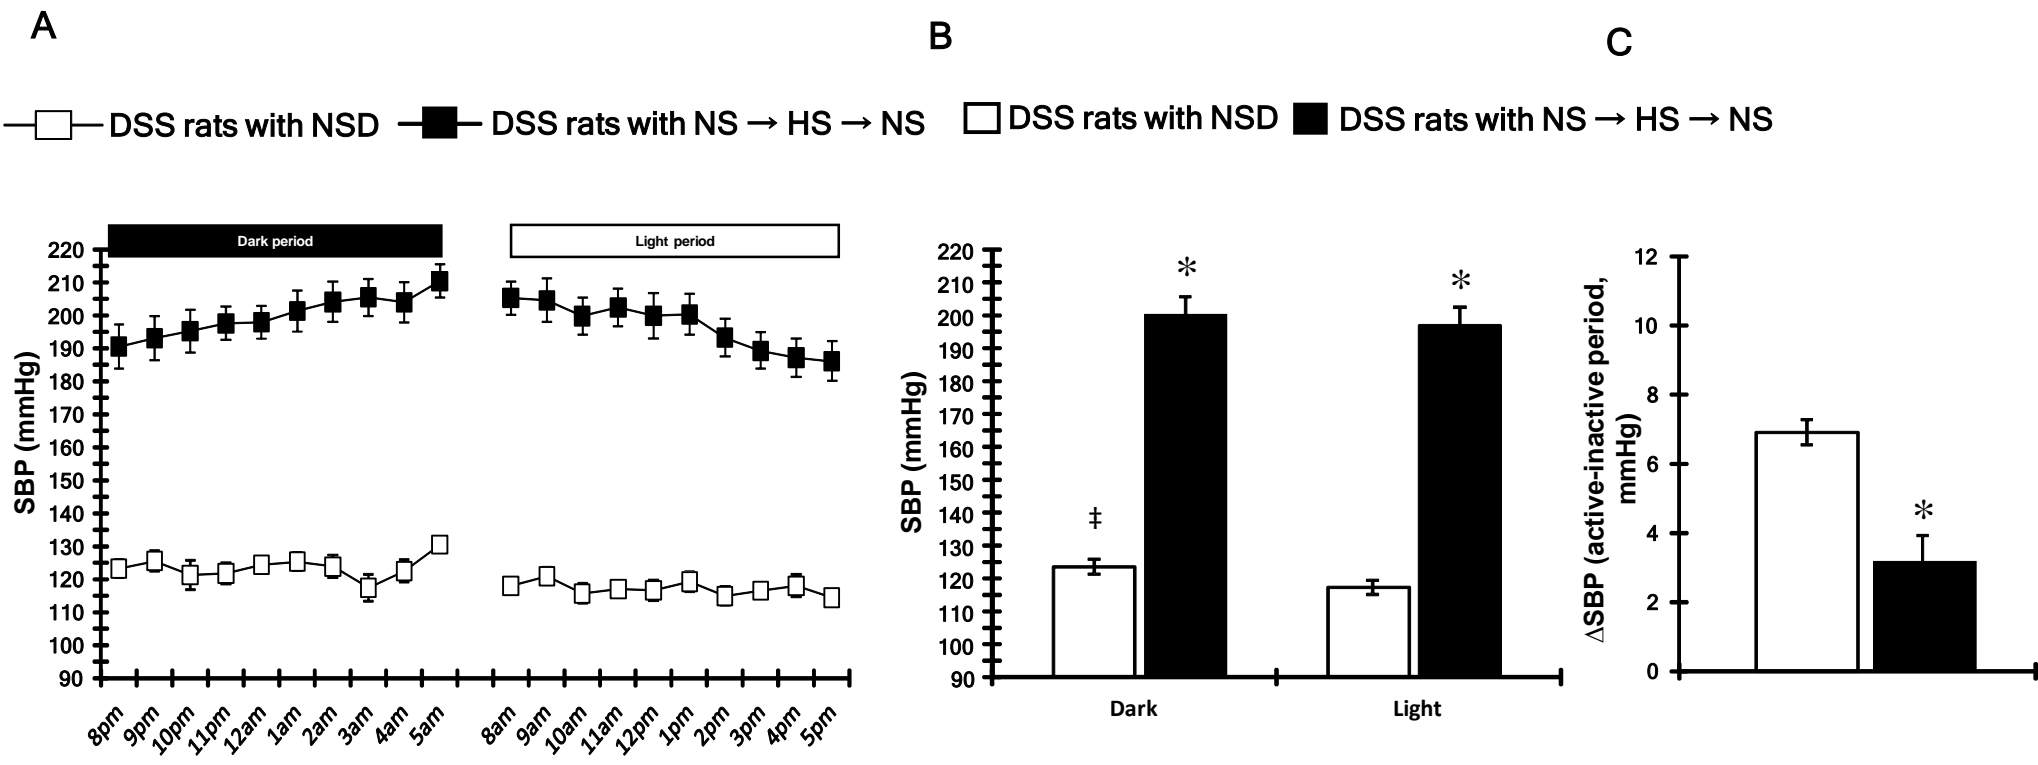

Figure S6

Ten weeks after HSD (week-17)

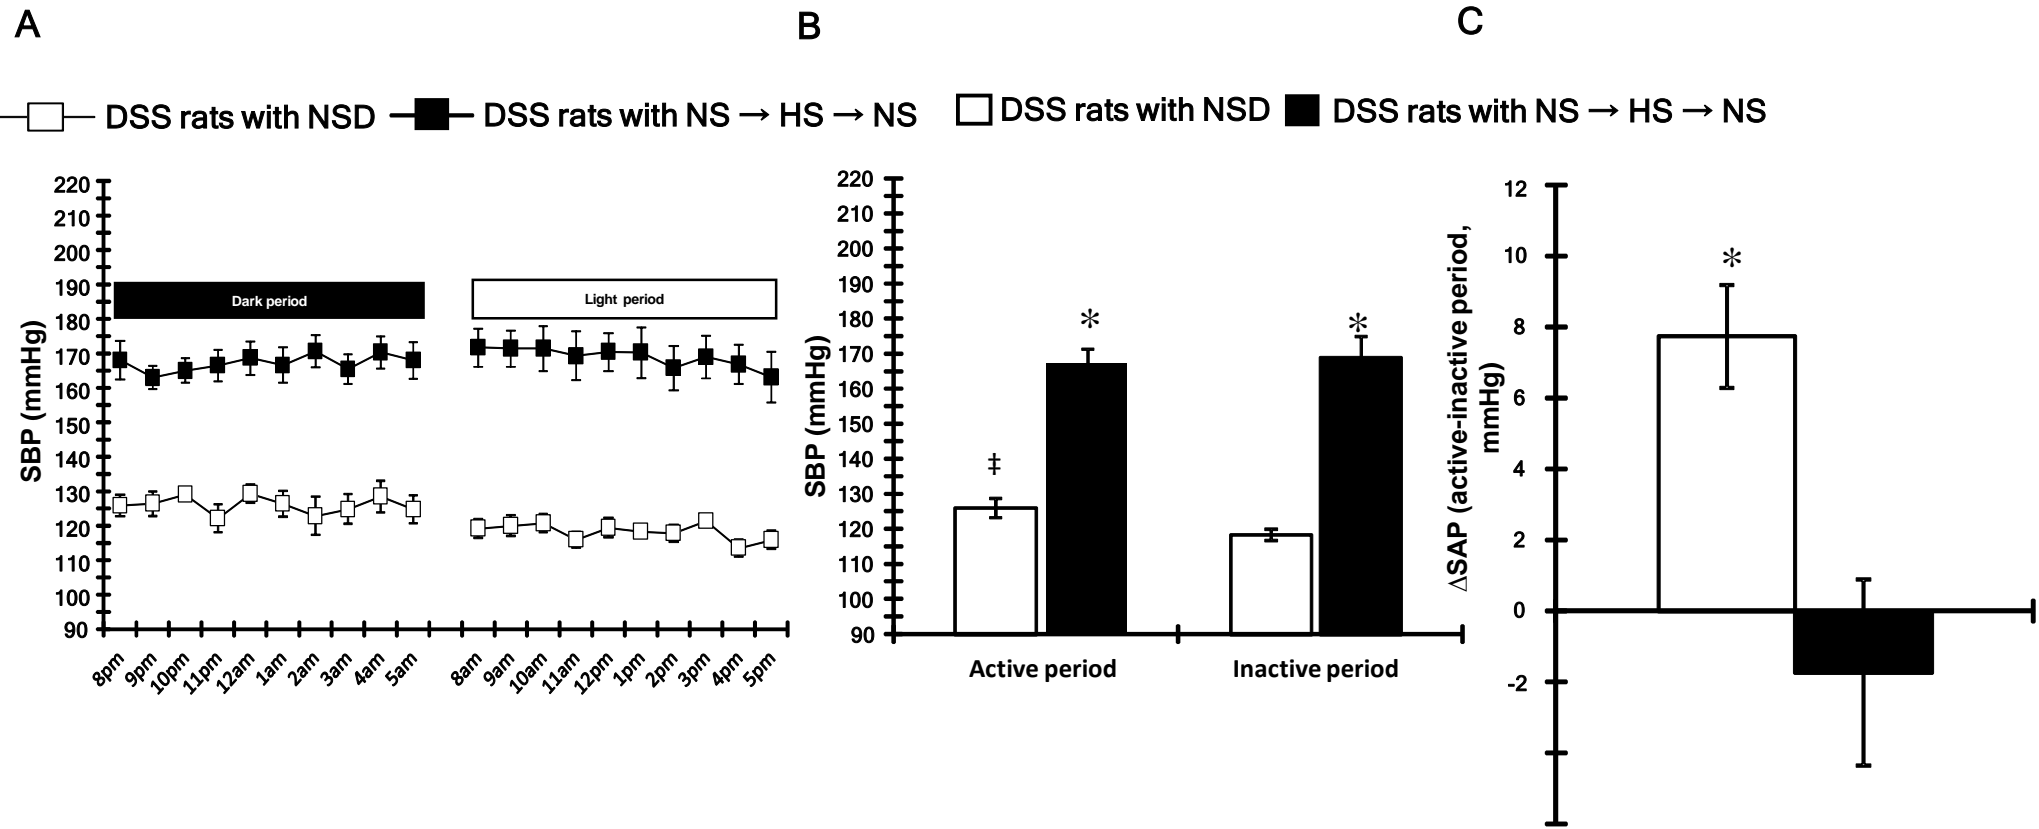

Four weeks after switching HSD to NSD (week-21)

A

□ DSS rats with NSD    ■ DSS rats with NS → HS → NS

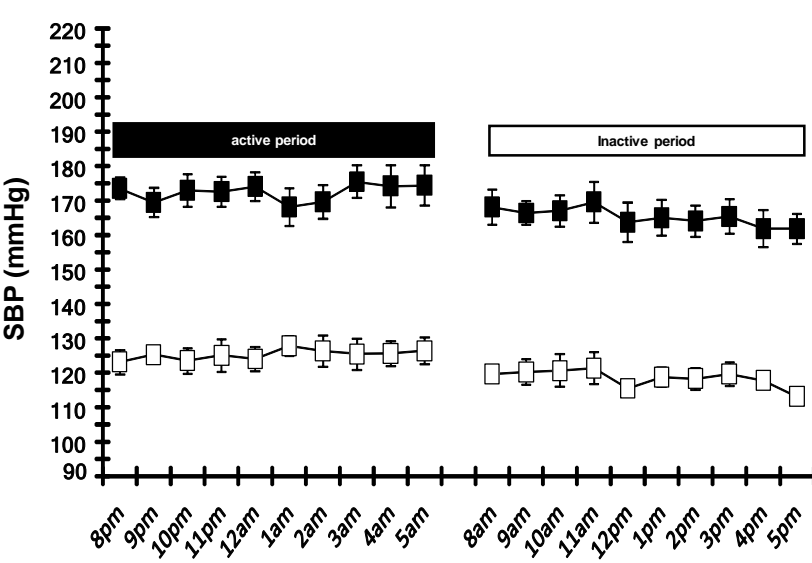

B

□ DSS rats with NSD    ■ DSS rats with NS → HS → NS

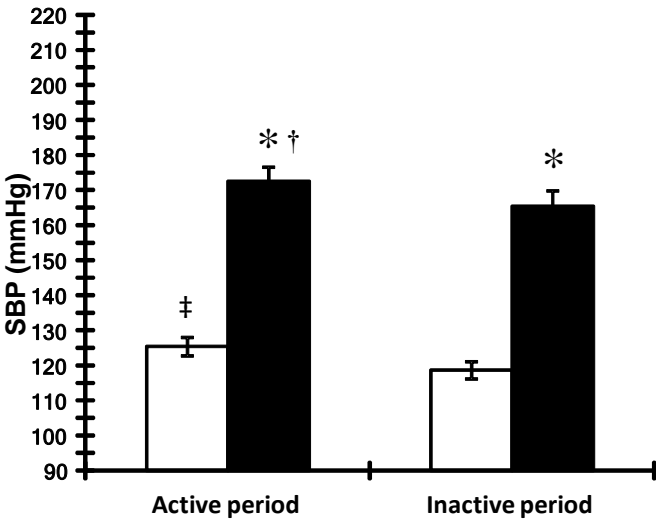

C

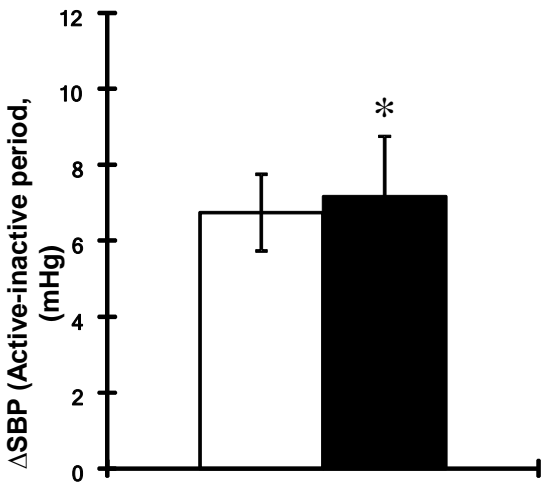

Figure S8

○ DSS rats with NSD    ● DSS rats with NSD → HSD → NSD

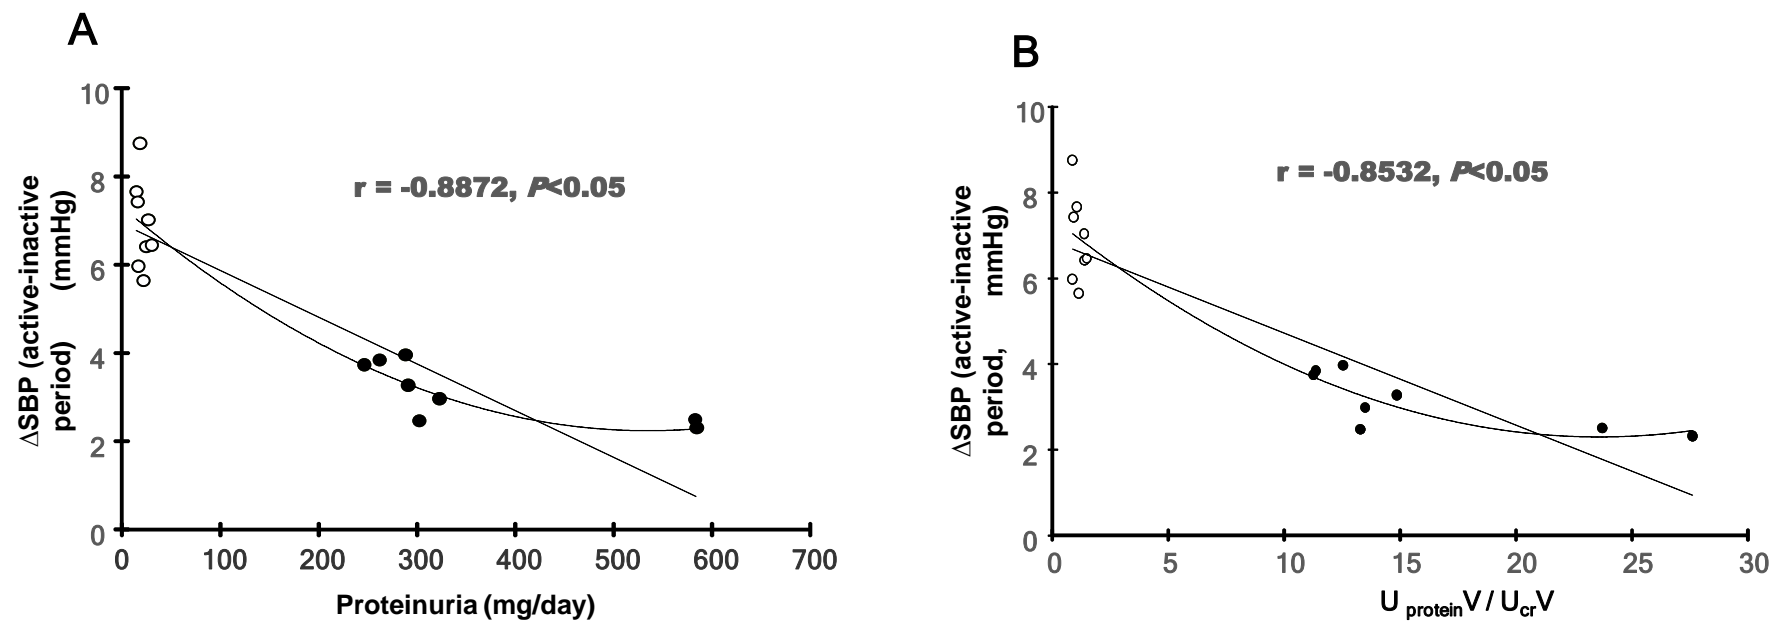



Figure S9

○ DSS rats with NSD    ● DSS rats with NSD → HSD → NSD

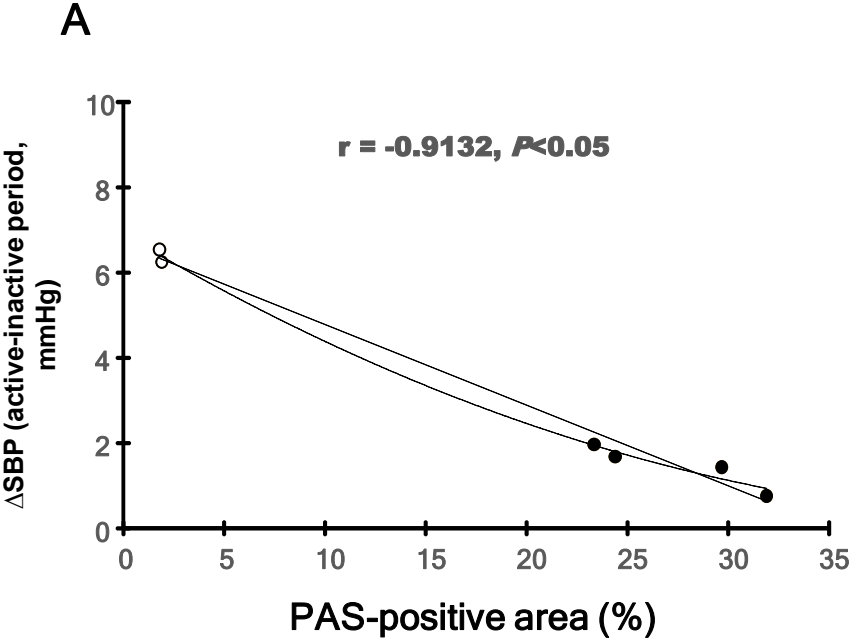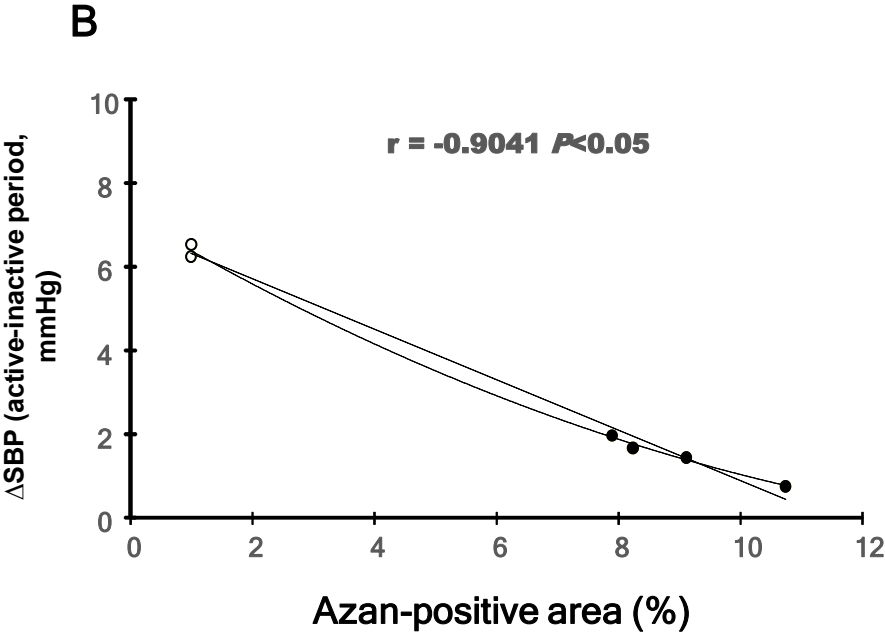

Figure S10

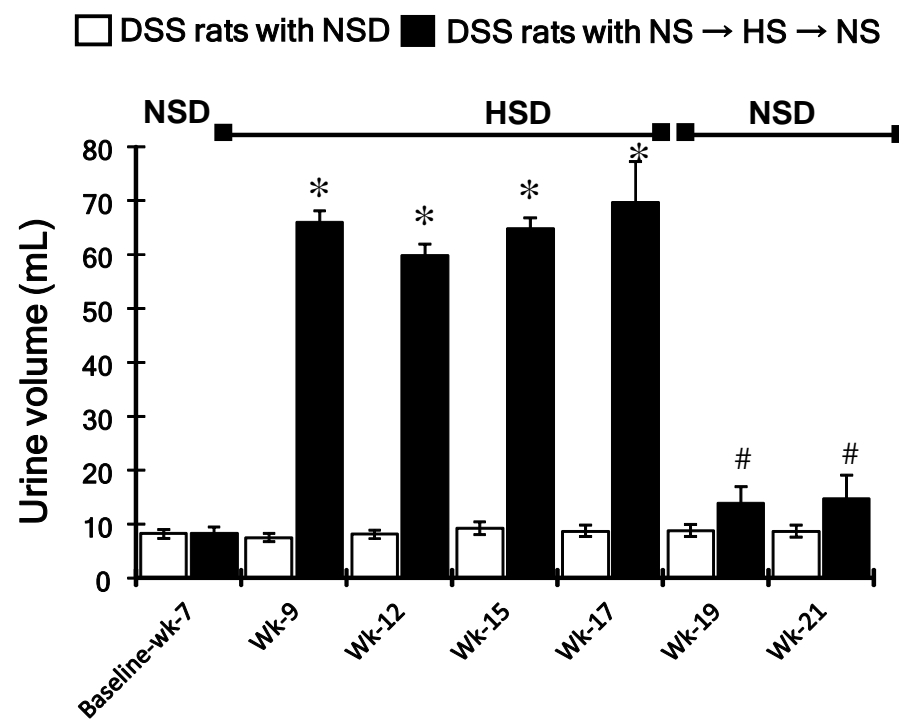

Supplement: s1 [file s1]
